# Supplementary material
Source: HighWire-hosted journal article supplement (https://openres.ersjournals.com/content/6/4/00147-2020)
Supplement: inline-supplementary-material-1 [file inline-supplementary-material-1.pdf]

## TLR3/TAK1 signalling regulates rhinovirus-induced IL-33 in bronchial smooth muscle cells

Sangeetha Ramu<sup>\*1</sup>, Jenny Calvén<sup>\*1</sup>, Charalambos Michaeloudes<sup>2</sup>, Mandy Menzel<sup>1</sup>, Hamid Akbarshahi<sup>1,3</sup>, Kian Fan Chung<sup>2</sup> and Lena Uller<sup>1</sup>

<sup>1</sup>Dept of Experimental Medical Science, Lund University, Lund, Sweden

<sup>2</sup>Airway Disease section, National Heart and Lung Institute, Imperial College London, London, United Kingdom

<sup>3</sup>Dept of Respiratory Medicine and Allergology, Lund University, Lund, Sweden

*\*These authors contributed equally*

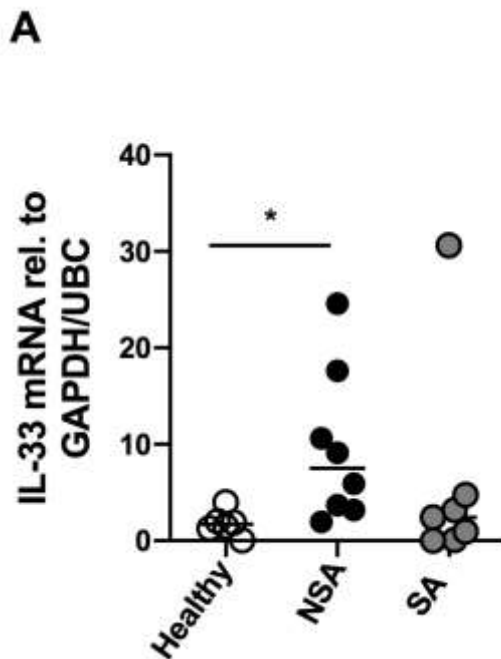

**Figure S1. IL-33 mRNA expression was higher in NSA patients compared to SA and healthy controls.** Healthy, severe and non-severe asthmatics BSMCs were cultured in medium alone for 24h and mRNA expression were measured in cell lysate (A). Data is presented as median fold change of healthy control relative to GAPDH/UBC expression. Data was obtained from 6 healthy, 8 NSA and 7 SA subjects. \*P<0.05 vs ctrl.

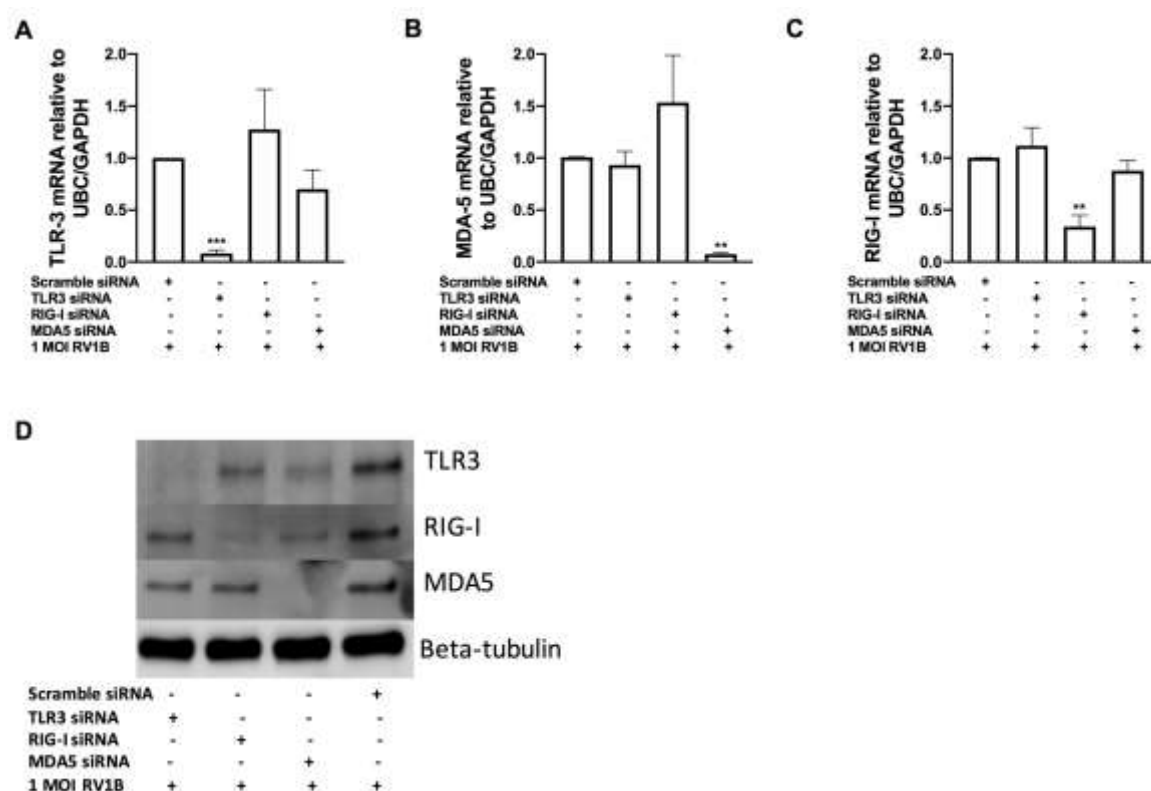

**Figure S2. Confirmation of knockdown of pattern recognition receptors by siRNA.** BSMCs were exposed to siRNA directed against TLR3 or RIG-I like helicases or to non-specific siRNA (scramble). Cells were infected with 1 MOI RV1B. mRNA expression of TLR3 (A), MDA5 (B) and RIG-I (C). A representative western blot image of TLR3, RIG-I and MDA5 protein is shown (D). Data is presented as  $\pm$  SEM fold change relative to GAPDH/UBC expression. Data was obtained from 6 healthy, 7 NSA and 7 SA subjects. \*\* $P < 0.01$ , \*\*\* $P < 0.001$  vs scramble+RV1B.
